# Supplementary material for: A hypocaloric protein-rich diet before metabolic surgery improves liver function in patients with obesity and diabetes
Source: Springer Nature journal article supplement (doi:10.1007/s00423-024-03600-9), 2025-01-13
Supplement: MOESM2 [file 423_2024_3600_MOESM2_ESM.pdf › 423_2024_3600_MOESM2_ESM.pdf]

## **Online Resource 2 – Inclusion and exclusion criteria to the superordinate MetaSurg Study**

Supplementary Information to:

### **A hypocaloric protein-rich diet before metabolic surgery improves liver function in patients with obesity and diabetes**

#### **A secondary analysis of a randomized clinical trial**

#### **Langenbeck's Archives of Surgery**

Natalie Krönert<sup>\*1</sup>, Yusef Moulla<sup>\*1</sup>, ORCID: 0000-0002-5936-0217, Undine Gabriele Lange<sup>1</sup>, ORCID: 0009-0009-5040-7128, Matthias Blüher<sup>2,3</sup>, ORCID: 0000-0003-0208-2065, Nicolas Linder<sup>4</sup>, Alexander Fuhrmann<sup>4</sup>, Harald Busse<sup>4</sup>, Anna Linder<sup>4</sup>, Thomas Karlas<sup>5</sup>, Johannes Wiegand<sup>5</sup>, Roland Morgenroth<sup>6</sup>, Lena Seidemann<sup>1†</sup>, ORCID: 0000-0002-1531-7735, Arne Dietrich<sup>1†</sup>

<sup>1</sup>Department of Visceral, Transplant, Thoracic and Vascular Surgery, Leipzig University Hospital, Leipzig, Germany

<sup>2</sup>Department of Endocrinology, Nephrology, Rheumatology, Leipzig University Hospital, Leipzig, Germany

<sup>3</sup>Helmholtz Institute for Metabolic, Obesity and Vascular Research (HI-MAG) of the Helmholtz Zentrum München at the University of Leipzig and University Hospital Leipzig, Leipzig, Germany

<sup>4</sup>Department of Diagnostic and Interventional Radiology, Leipzig University Hospital, Leipzig, Germany

<sup>5</sup>Department of Oncology, Gastroenterology, Hepatology, Pneumology and Infectiology, Leipzig University Hospital, Leipzig, Germany

<sup>6</sup>Integrated Research and Treatment Center (IFB) Adiposity Diseases, University Hospital Leipzig, Leipzig, Germany

<sup>\*</sup>Contributed equally as co-first authors

<sup>†</sup>Contributed equally as co-last authors

**Correspondence:** Prof. Dr. Arne Dietrich, Clinic for Visceral, Transplant, Thoracic and Vascular Surgery, Leipzig University Hospital, Liebigstr. 20, D-04103 Leipzig, Germany, arne.dietrich@medizin.uni-leipzig.de

### Inclusion Criteria

- Body mass index (BMI)  $\geq 27$  to  $\leq 60$  kg/m<sup>2</sup>
- Type 2 diabetes mellitus (T2DM)
  - for patients BMI  $\geq 35$  kg/m<sup>2</sup>: any T2DM
  - for patients BMI  $< 35$  kg/m<sup>2</sup>:
    - unsatisfactory medical non-insulin treatment (multiple medications, HbA1c  $> 6.5\%$ , hypo- or hyperglycaemias) or
    - planned insulin treatment or ongoing insulin treatment
- males and females, age  $\geq 18$  years
- written informed consent

### Exclusion Criteria

- any chronic inflammatory or malignant disease
- type 1 diabetes (C-Peptide  $< 0,5$  µg/l, GAD-Ab or ICA-Ab positive)
- peptic ulcer
- contraindication for general anaesthesia
- drug or alcohol abuse
- untreated thyroid dysfunction
- pregnancy or breast feeding woman
- fertile women (within two years of their last menstruation) without appropriate contraceptive measures (implanon, injections, oral contraceptives, intrauterine devices, partner with vasectomy) while participating in the investigation
- expected non-compliance
- participation in other interventional trial
